# Supplementary material for: Spike-timing-dependent ensemble encoding by non-classically responsive cortical neurons
Source: eLife journal article supplement (doi:10.7554/elife.42409), 2019-01-28
Supplement: supp [file elife-42409-supp-v1.zip]

Archive with 17 entries (17 files):
- elife_poa_e42409_Transparent_Reporting_File.docx
- elife_poa_e42409_Figure_1_figure_supplement_4.pdf
- elife_poa_e42409_Figure_1_figure_supplement_5.pdf
- elife_poa_e42409_Figure_1_figure_supplement_3.pdf
- elife_poa_e42409_Figure_4_figure_supplement_1.pdf
- elife_poa_e42409_Figure_5_source_data_1.csv
- elife_poa_e42409_Figure_4_figure_supplement_3.pdf
- elife_poa_e42409_Figure_4_figure_supplement_4.pdf
- elife_poa_e42409_Figure_1_figure_supplement_2.pdf
- elife_poa_e42409_Figure_3_figure_supplement_1.pdf
- elife_poa_e42409_Figure_2_source_data_1.csv
- elife_poa_e42409_Figure_1_figure_supplement_1.pdf
- elife_poa_e42409_Figure_1_figure_supplement_6.pdf
- elife_poa_e42409_Figure_4_figure_supplement_2.pdf
- elife_poa_e42409_Figure_7_figure_supplement_1.pdf
- elife_poa_e42409_Figure_5_figure_supplement_1.pdf
- elife_poa_e42409_Figure_3_figure_supplement_2.pdf
