# Supplementary material for: Spike-timing-dependent ensemble encoding by non-classically responsive cortical neurons
Source: eLife journal article supplement (doi:10.7554/elife.42409), 2019-01-28

## A AC tone evoked

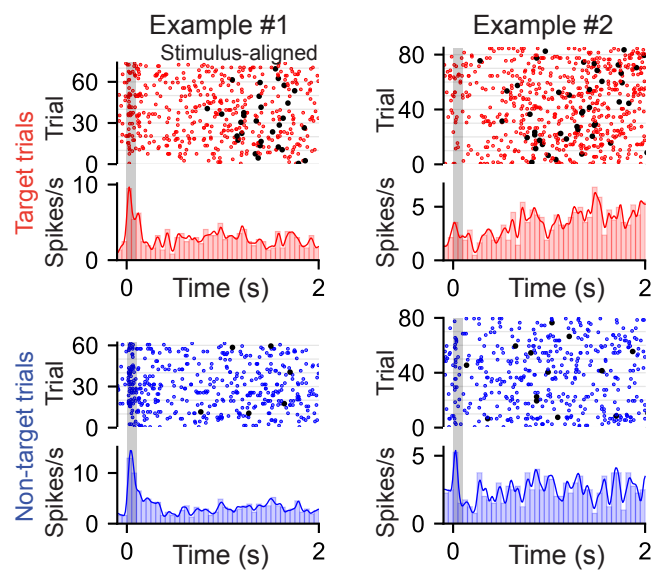

## B FR2 tone evoked

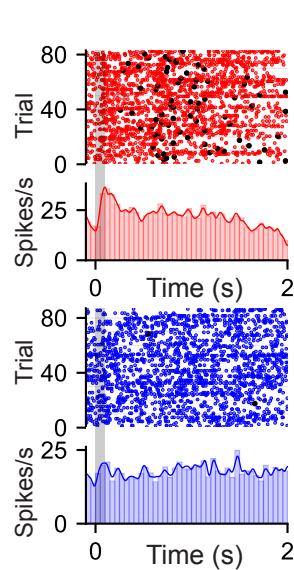

## C AC ramping

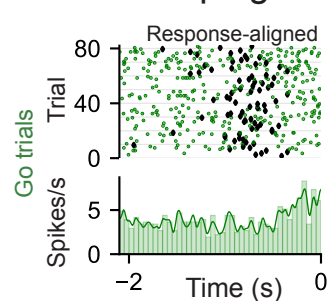

## D FR2 ramping

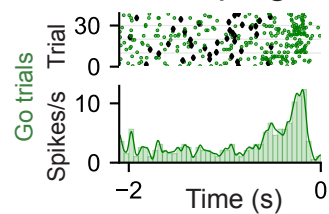

## E AC non-classically responsive

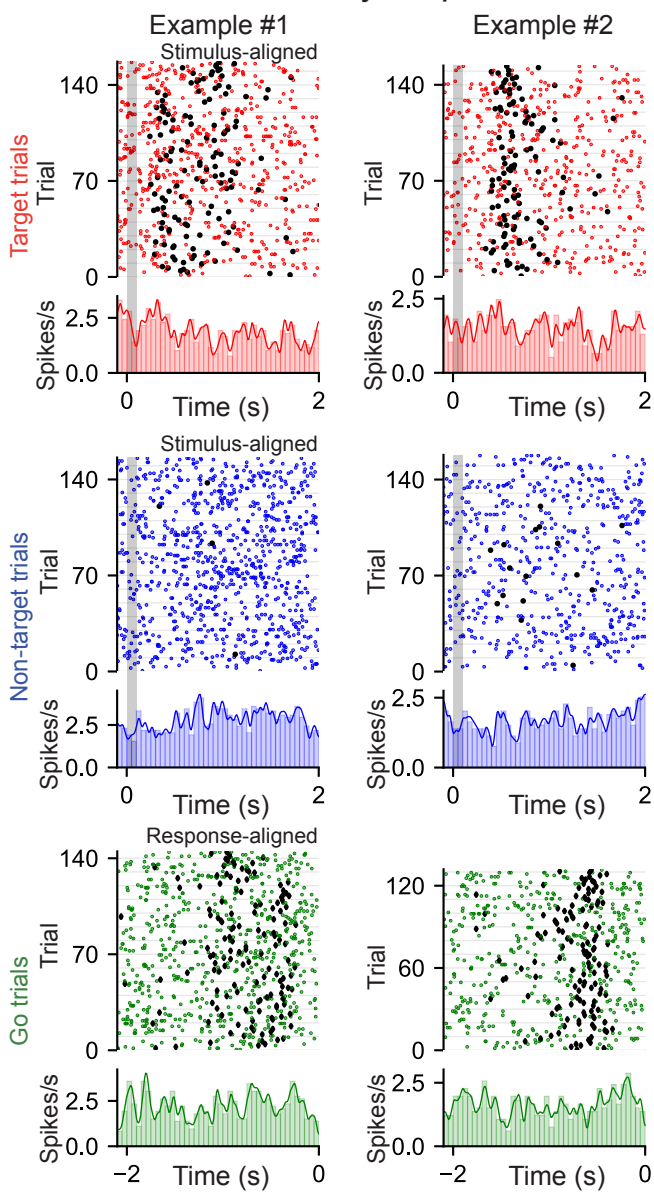

## F FR2 non-classically responsive

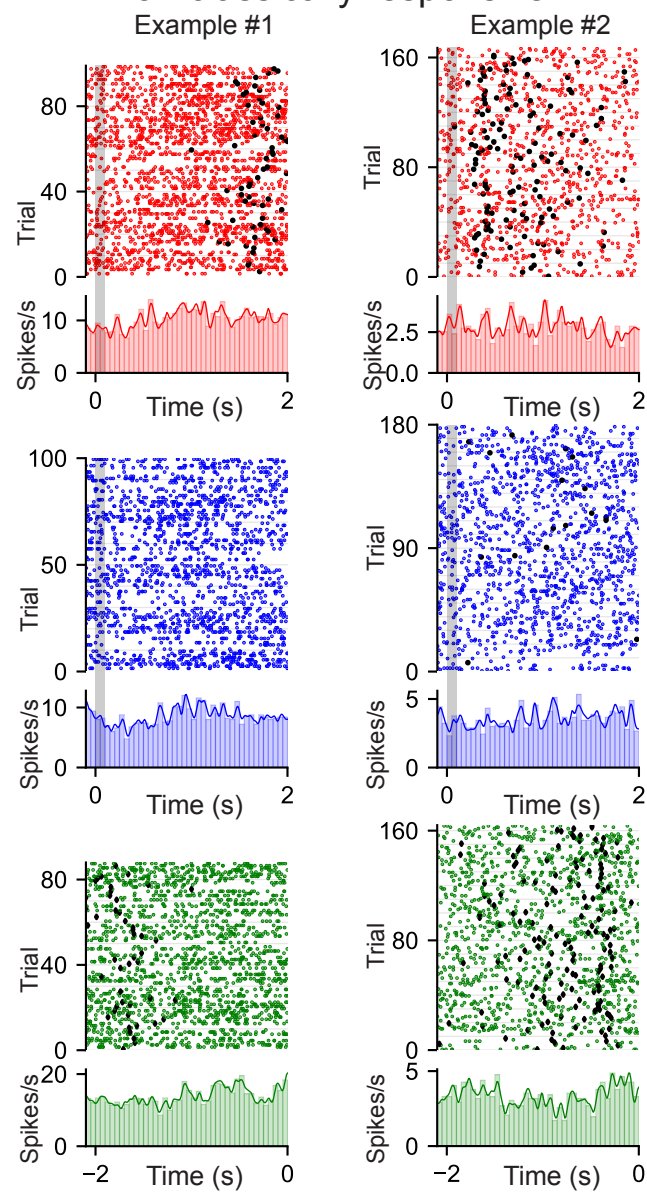

Supplement: supp [file elife-42409-supp-v1.zip › elife_poa_e42409_Figure_1_figure_supplement_5.pdf]
