# Supplementary material for: Spike-timing-dependent ensemble encoding by non-classically responsive cortical neurons
Source: eLife journal article supplement (doi:10.7554/elife.42409), 2019-01-28

**A**

Spontaneous activity  
(100 ms window)

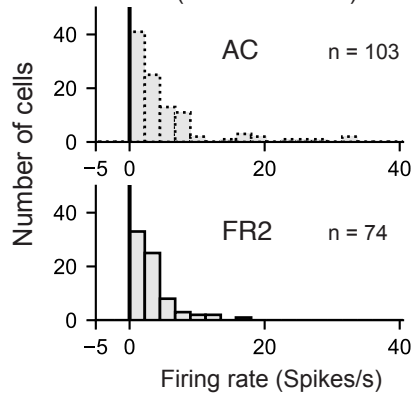**B**

Tone-evoked response  
(100 ms window)

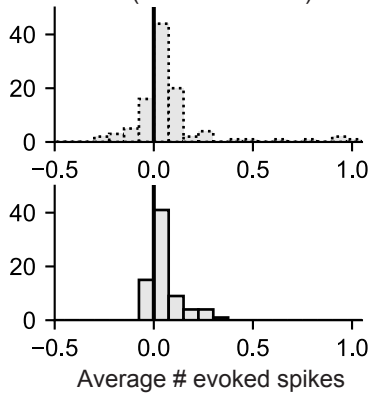**C**

Activity before motor response

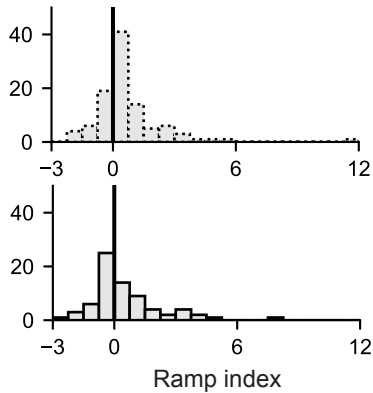

Supplement: supp [file elife-42409-supp-v1.zip › elife_poa_e42409_Figure_1_figure_supplement_6.pdf]
