# Supplementary material for: Spike-timing-dependent ensemble encoding by non-classically responsive cortical neurons
Source: eLife journal article supplement (doi:10.7554/elife.42409), 2019-01-28
Supplement: supp [file elife-42409-supp-v1.zip › elife_poa_e42409_Figure_2_source_data_1.csv]

	region	stim_dec_perf	choice_dec_perf	stim_sig	choice_sig	NNR
0	AC	0.5431349528681527	0.5293020832493732	True	True	True
1	AC	0.5864101439455424	0.5946532709858253	True	True	True
2	AC	0.5900482450909951	0.5732634590582288	True	False	False
3	AC	0.705056348051589	0.5315878356784375	True	False	True
4	AC	0.5137550519862576	0.6885673673783539	False	True	True
5	AC	0.5295618202349136	0.5505664137504127	True	True	False
6	AC	0.5335067297242707	0.565476542288628	True	True	False
7	AC	0.5459153358450258	0.5389340920374365	True	True	True
8	AC	0.5380131961875655	0.5149842200186777	True	False	False
9	AC	0.4947076309357755	0.5484405115247938	False	True	True
10	AC	0.5024521340370729	0.5764297723038477	False	True	True
11	AC	0.5138104636938153	0.532724079902086	False	True	False
12	AC	0.5403666589566847	0.5466442954956559	True	True	True
13	AC	0.49564566368887303	0.6247409914495744	False	True	True
14	AC	0.46401625147969755	0.6110821381485607	False	True	False
15	AC	0.5055046791535989	0.5800371574459151	False	True	False
16	AC	0.5858471963113899	0.5464838909494254	True	True	False
17	AC	0.6323329514972077	0.5784355070687457	True	True	False
18	AC	0.5063137909034703	0.5773110368986638	False	True	True
19	AC	0.5442307116631947	0.5066203302771528	True	False	False
20	AC	0.5153074766854078	0.542191479452154	False	True	True
21	AC	0.5698896864360368	0.5766544476672539	True	True	True
22	AC	0.5223497789414672	0.5166879673524494	True	False	True
23	AC	0.550248565308701	0.5324817432426265	True	True	True
24	AC	0.5441207745840028	0.5154296348451242	True	False	False
25	AC	0.5515010295805716	0.537093948645214	True	False	False
26	AC	0.5194514530827151	0.5450138127822903	True	True	False
27	AC	0.5566572596521557	0.5661372047784273	True	True	True
28	AC	0.5253189744113456	0.49720604279695996	True	False	True
29	AC	0.5106615344506948	0.5876647202395754	False	True	False
30	AC	0.53986126826182	0.5648634879133712	True	True	True
31	AC	0.5280957379711823	0.5370830088418738	False	True	True
32	AC	0.5493619609976548	0.540158273817866	True	True	False
33	AC	0.5176976142748214	0.5153247045167519	True	False	False
34	AC	0.5303233778573636	0.5671725955597666	False	True	False
35	AC	0.5597811670085027	0.6053225820316995	True	True	False
36	AC	0.6084748301442384	0.5878140094083435	True	True	False
37	AC	0.5306175690838397	0.4971474582589901	True	False	False
38	AC	0.5191414944310556	0.506828552875576	True	False	True
39	AC	0.5146472836902666	0.5460099387503138	False	True	True
40	AC	0.5847883563397398	0.58368333004364	True	True	False
41	AC	0.5290458198853983	0.5533425152523864	True	True	True
42	AC	0.5759019035769759	0.542275871949756	True	True	True
43	AC	0.6328187334294364	0.5587047958797937	True	True	True
44	AC	0.6302774821175129	0.5413652766190749	True	True	True
45	AC	0.5401394947851391	0.4923002827714282	True	False	False
46	AC	0.5352557595390032	0.6146175864602987	True	True	False
47	AC	0.5536876850048823	0.5728756682282407	True	True	False
48	AC	0.52815253244213	0.6152083955342182	False	True	False
49	AC	0.5516258543730692	0.5943941235057042	False	True	False
50	AC	0.548690488772753	0.5200260758297842	True	False	True
51	AC	0.5663028747992442	0.5083850909050275	True	False	True
52	AC	0.5308271785592853	0.6095981274656791	False	True	False
53	AC	0.5323046131913853	0.6362008424886778	False	True	False
54	AC	0.498617423967673	0.5533790689440014	False	True	True
55	AC	0.4932555017712013	0.5722026939690432	False	True	False
56	FR2	0.6279837428799243	0.6222348926815925	True	True	False
57	FR2	0.5683299067928964	0.5296154263442526	True	False	True
58	FR2	0.5013595520949969	0.554428362467852	False	True	False
59	FR2	0.5497126742886205	0.5826445268395486	True	True	False
60	FR2	0.6056229906567708	0.5099651073447881	True	False	False
61	FR2	0.5840493021941732	0.5637216462956456	True	True	False
62	FR2	0.545676650725286	0.48468207959842613	True	False	False
63	FR2	0.5093013004904291	0.5568079634733808	False	True	True
64	FR2	0.6464571708737631	0.5878501700771042	True	True	True
65	FR2	0.5432963609695729	0.5142286517770829	True	False	False
66	FR2	0.5074812753053909	0.5546283364194138	False	True	False
67	FR2	0.5972986794805186	0.6536052556627265	True	True	False
68	FR2	0.5363017681834983	0.5605380957511839	True	True	True
69	FR2	0.5645474112313468	0.6416288931457328	True	True	True
70	FR2	0.6586201569131833	0.5456367303513215	True	False	True
71	FR2	0.5476888961560362	0.5576296686028915	True	True	True
72	FR2	0.5310973484797263	0.6035741319689982	False	True	False
73	FR2	0.6328114685465536	0.558097995751892	True	True	True
74	FR2	0.6395491532490747	0.4793541270446686	True	False	False
75	FR2	0.7330487619052438	0.5700344782681074	True	True	False
76	FR2	0.7895777131631566	0.6818555916496484	True	True	False
77	FR2	0.5574113801702014	0.5593650412793586	True	True	True
78	FR2	0.7010613522803308	0.6231238097359328	True	True	False
79	FR2	0.5318658576750702	0.5480156731087582	False	True	False
80	FR2	0.5740242863653185	0.5314539218936489	True	False	False
81	FR2	0.5606205707085542	0.566783919090453	True	True	False
82	FR2	0.5072800568691378	0.5807951563804603	False	True	True
83	FR2	0.5691363656669686	0.5301387290170742	True	False	False
84	FR2	0.5277125346126715	0.5682270305267836	False	True	True
85	FR2	0.4906626711782724	0.5777351365789901	False	True	True
86	FR2	0.5124898399846071	0.5579675254514443	False	True	True
87	FR2	0.5751150535946834	0.5683070287282316	True	True	False
88	FR2	0.538232789873518	0.5348414389650187	True	True	False
89	FR2	0.594651278473528	0.5575665372522758	True	True	False
90	FR2	0.5379617023738115	0.5737620416274334	True	True	False
91	FR2	0.6042530811642879	0.5662494831545738	True	True	False
92	FR2	0.6651256328704649	0.5387809853479962	True	True	False
93	FR2	0.5504483807201613	0.5610291978592412	True	True	False
94	FR2	0.558493953846032	0.4853924331866772	True	False	True
95	FR2	0.598726626717849	0.5525119091464687	True	True	False
96	FR2	0.5379815534953603	0.5428110867147259	True	False	True
97	FR2	0.5794610231356285	0.542133790239229	True	True	True
98	FR2	0.544835734137658	0.5403575009461844	True	True	False
