# Supplementary material for: Spike-timing-dependent ensemble encoding by non-classically responsive cortical neurons
Source: eLife journal article supplement (doi:10.7554/elife.42409), 2019-01-28

# **A** AC in vivo whole-cell

Stim

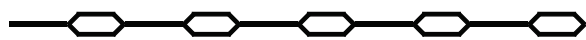

Cell 1

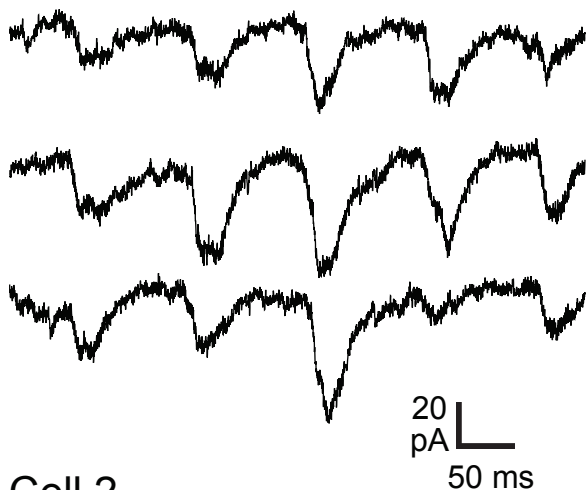

Cell 2

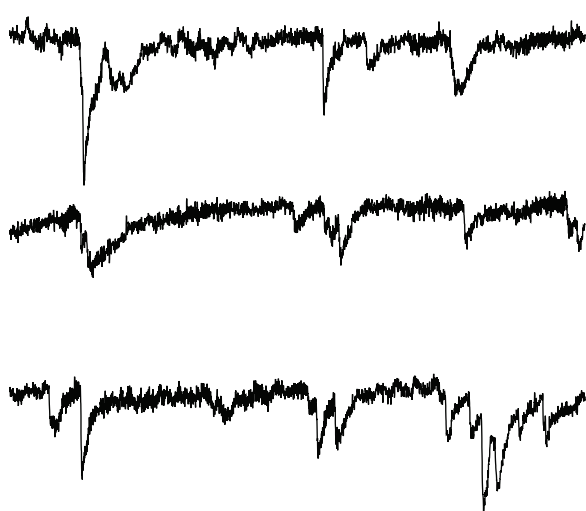

# **B** AC in vitro whole-cell

Stim

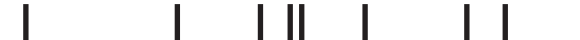

Cell 1

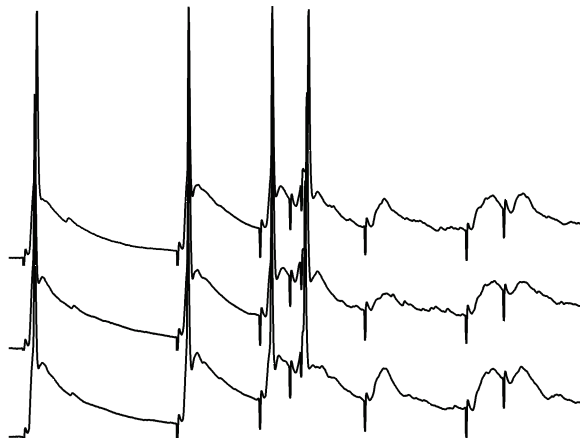

Cell 2

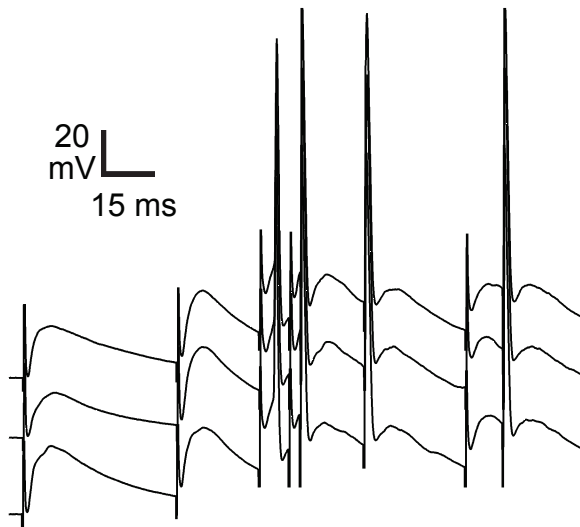

# **C** FR2 in vitro whole-cell

Stim

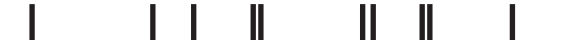

Cell 1

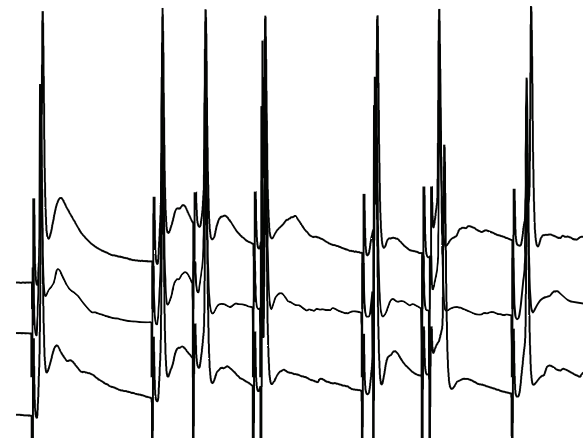

Cell 2

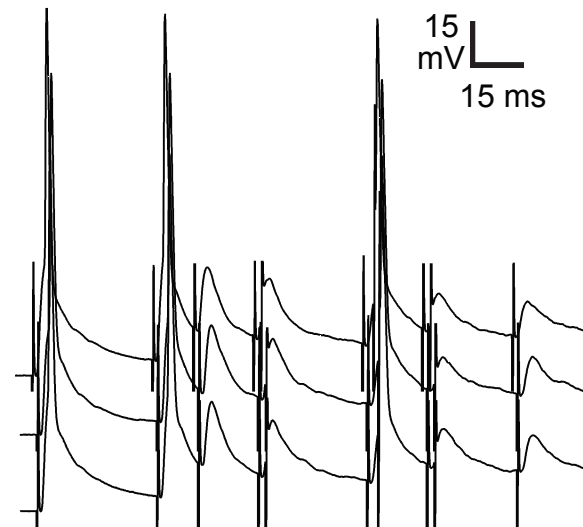

Supplement: supp [file elife-42409-supp-v1.zip › elife_poa_e42409_Figure_5_figure_supplement_1.pdf]
