# Supplementary material for: Spike-timing-dependent ensemble encoding by non-classically responsive cortical neurons
Source: eLife journal article supplement (doi:10.7554/elife.42409), 2019-01-28
Supplement: supp [file elife-42409-supp-v1.zip › elife_poa_e42409_Figure_5_source_data_1.csv]

	region	block_dec_perf	NNR
0	AC	0.6125291783380019	True
1	AC	0.6256584933483936	False
2	AC	0.5270615671906126	False
3	AC	0.6334746299675588	True
4	AC	0.5305444735179682	True
5	AC	0.5491447765700483	False
6	AC	0.5664434523809523	True
7	AC	0.5744158927376172	False
8	AC	0.542838367823765	True
9	AC	0.6212307563587683	False
10	AC	0.5542119565217392	False
11	AC	0.5638430229397694	False
12	AC	0.5328900329910444	False
13	AC	0.5352313027166172	False
14	AC	0.5550282089488566	False
15	AC	0.5600251378113515	False
16	AC	0.5465637490007994	True
17	AC	0.5557156492868319	False
18	AC	0.5524064220000532	True
19	AC	0.5551665729986262	True
20	AC	0.5689239639792231	True
21	AC	0.653022613960114	False
22	AC	0.7590525793650794	False
23	AC	0.5494566722037653	True
24	AC	0.5990340307550149	False
25	AC	0.538578506097561	True
26	AC	0.6643323664353694	False
27	AC	0.5357464028776978	False
28	AC	0.5498417303629132	False
29	AC	0.5377423502423502	False
30	AC	0.6112862539664112	False
31	AC	0.5658696163213713	True
32	AC	0.6905637254901961	False
33	AC	0.5398783493841719	False
34	AC	0.5305512152777778	True
35	AC	0.5425130208333334	True
36	AC	0.709170773767824	False
37	AC	0.5592056807106149	False
38	AC	0.5479357798165138	True
39	AC	0.6376973899525445	False
40	AC	0.5708088549894682	False
41	AC	0.6446180555555554	True
42	AC	0.5770818059628544	False
43	AC	0.5868299049400032	True
44	AC	0.5492791820366644	True
45	AC	0.5729750159294748	False
46	AC	0.584901831372386	False
47	AC	0.7916666666666669	False
48	AC	0.5608240250788605	False
49	AC	0.564792056803995	False
50	AC	0.5359684743690507	True
51	AC	0.6000718704512372	False
52	AC	0.7398313492063492	False
53	AC	0.5957847623635196	False
54	AC	0.6420843397745571	False
55	AC	0.6369654088050315	False
56	AC	0.5664002065752461	False
57	AC	0.5912912161931513	True
58	AC	0.5754910648499011	False
59	AC	0.5578265396471435	False
60	AC	0.6129631273674243	False
61	AC	0.5446202917642466	False
62	AC	0.5303095974335812	False
63	AC	0.5888927045177045	False
64	AC	0.6039675305478912	False
65	AC	0.6298115079365079	False
66	AC	0.5406834608843537	False
67	AC	0.5340928819444445	False
68	AC	0.576591448853199	False
69	AC	0.6012331224034467	True
70	AC	0.5735360360360361	False
71	AC	0.6362847222222222	False
72	AC	0.5482716480446927	True
73	AC	0.5554371843434344	False
74	AC	0.5625049761146498	False
75	AC	0.5549324354210898	False
76	AC	0.5208431966178279	False
77	AC	0.525731271043771	False
78	AC	0.5371237151248165	False
79	AC	0.5636205808080809	False
80	AC	0.5963613671274961	True
81	AC	0.5739109848484848	False
82	AC	0.5276763771701107	False
83	AC	0.5869010939625575	False
84	AC	0.6140603296802511	False
85	AC	0.6055315235497779	False
86	AC	0.5752160045219638	False
87	AC	0.5884132886895123	False
88	AC	0.5463690476190476	False
89	AC	0.5439362930310664	False
90	AC	0.5697858174529483	False
91	AC	0.5495629430207197	False
92	AC	0.6084750092902267	False
93	AC	0.6193199282786885	False
94	AC	0.5640434894053316	False
95	AC	0.5367490500524109	False
96	AC	0.5	False
97	AC	0.5958650884921254	False
98	AC	0.5553026676138704	False
99	AC	0.5614565704754123	False
100	AC	0.5663991525664319	False
101	AC	0.58919542585967	False
102	AC	0.65991512345679	False
103	AC	0.5805205335958402	False
104	AC	0.7057291666666666	False
105	AC	0.6188813315274563	False
106	AC	0.596248308982684	False
107	AC	0.5646122685185185	True
108	AC	0.5778377721312504	False
109	AC	0.5772585549371264	True
110	AC	0.6086549539170507	False
111	AC	0.5969655827718563	False
112	AC	0.5617864372469635	False
113	AC	0.6127232142857143	False
114	AC	0.66572574513382	True
115	AC	0.5782503858024691	False
116	AC	0.5901668595679013	False
117	AC	0.5219233630952381	True
118	AC	0.5599309950773558	False
119	AC	0.5572804766451819	True
120	AC	0.5476313437646507	False
121	AC	0.656532579787234	True
122	AC	0.5707774596216693	True
123	AC	0.5786352838430001	True
124	AC	0.5430138156081428	False
125	AC	0.5348033339726378	True
126	AC	0.5485894097222223	True
127	AC	0.5666852678571428	False
128	AC	0.523568984885621	False
129	AC	0.5734346523064354	False
130	AC	0.5269385715262048	False
131	AC	0.5444800475687103	False
132	AC	0.5423307667230272	False
133	AC	0.5487165047484814	False
134	AC	0.5715847795497185	False
135	AC	0.643572695035461	False
136	AC	0.5597328210435366	False
137	AC	0.5515610492107706	False
138	AC	0.5561628709454797	False
139	AC	0.5417290673927841	False
140	AC	0.5441127232142857	False
141	AC	0.6178937484084543	False
142	AC	0.5482780499646892	False
143	AC	0.6378720238095238	False
144	AC	0.5355216240987829	False
145	AC	0.5334989011731578	False
146	AC	0.5785171134605045	False
147	AC	0.5836864730175942	True
148	AC	0.5826982650868954	False
149	AC	0.538972721424909	False
150	AC	0.5300808009607351	False
151	AC	0.6138523391812866	False
152	AC	0.6670526413690476	True
153	PFC	0.5340027835567883	False
154	PFC	0.5353232024542739	True
155	PFC	0.6556299603174603	False
156	PFC	0.6670833333333333	False
157	PFC	0.5688640484267166	False
158	PFC	0.5510640612203112	False
159	PFC	0.54640625	False
160	PFC	0.573609895707602	False
161	PFC	0.539595122682342	False
162	PFC	0.5579665054524483	False
163	PFC	0.590380025547936	True
164	PFC	0.5309658951299818	False
165	PFC	0.5247561177248677	False
166	PFC	0.5602037863756614	False
167	PFC	0.55592004001847	False
168	PFC	0.5367570846746659	False
169	PFC	0.7270833333333334	True
170	PFC	0.541798779697064	False
171	PFC	0.5282364388062918	False
172	PFC	0.7100694444444445	False
173	PFC	0.5753648964765464	False
174	PFC	0.7779513888888889	False
175	PFC	0.5963497733188018	False
176	PFC	0.5410218470765346	True
177	PFC	0.6495265151515152	False
178	PFC	0.6378515221878224	False
179	PFC	0.6373717856457494	False
180	PFC	0.6118859649122808	False
181	PFC	0.5385746641808064	False
182	PFC	0.5570320012333292	True
183	PFC	0.6925347222222223	False
184	PFC	0.552313697425535	False
185	PFC	0.5510751380883766	False
186	PFC	0.5735605246883443	False
187	PFC	0.5658103813559322	False
188	PFC	0.562558454919566	False
189	PFC	0.5826742402454222	False
190	PFC	0.5330308291245792	False
191	PFC	0.724069841796135	False
192	PFC	0.5834529241487588	False
193	PFC	0.5436592462096946	False
194	PFC	0.5911090662766162	False
195	PFC	0.5906803226182157	False
196	PFC	0.5451486789891394	False
197	PFC	0.6469857059401994	False
198	PFC	0.609484011627907	True
199	PFC	0.626736111111111	False
200	PFC	0.5402422858511221	False
201	PFC	0.6234375	False
202	PFC	0.5839165581597222	False
203	PFC	0.5795888696922199	False
204	PFC	0.5681503978217154	False
205	PFC	0.604735318444996	False
206	PFC	0.6333896285338593	True
207	PFC	0.6408106219426973	True
208	PFC	0.7083333333333331	False
209	PFC	0.5767203808572063	False
210	PFC	0.5831628396631178	False
211	PFC	0.5967735304591922	False
212	PFC	0.5918478260869565	False
213	PFC	0.55725947761772	True
214	PFC	0.5830445139121222	False
215	PFC	0.580362847258099	False
216	PFC	0.5787478210751237	True
217	PFC	0.6407306635672021	False
218	PFC	0.6028287368146044	False
219	PFC	0.6199978445044234	False
220	PFC	0.5509742448759439	False
221	PFC	0.6045496323529412	False
222	PFC	0.5561280807913351	False
223	PFC	0.547431587638594	False
224	PFC	0.559701797385621	False
225	PFC	0.5854166666666665	True
226	PFC	0.5518658701403266	True
227	PFC	0.6360267857142856	False
228	PFC	0.7619047619047619	True
229	PFC	0.5429409636062862	False
230	PFC	0.587311787122908	True
231	PFC	0.5448365185661289	True
232	PFC	0.5623772433483936	False
233	PFC	0.5462971895298733	False
234	PFC	0.5964336041114059	True
235	PFC	0.5354575106599926	True
236	PFC	0.7129345799506032	True
237	PFC	0.601967049973086	False
238	PFC	0.5490373883928572	False
239	PFC	0.5897435961811414	False
240	PFC	0.5391860058800848	False
