# Supplementary figures and images for: Spike-timing-dependent ensemble encoding by non-classically responsive cortical neurons
Source: eLife journal article supplement (doi:10.7554/elife.42409), 2019-01-28

**A**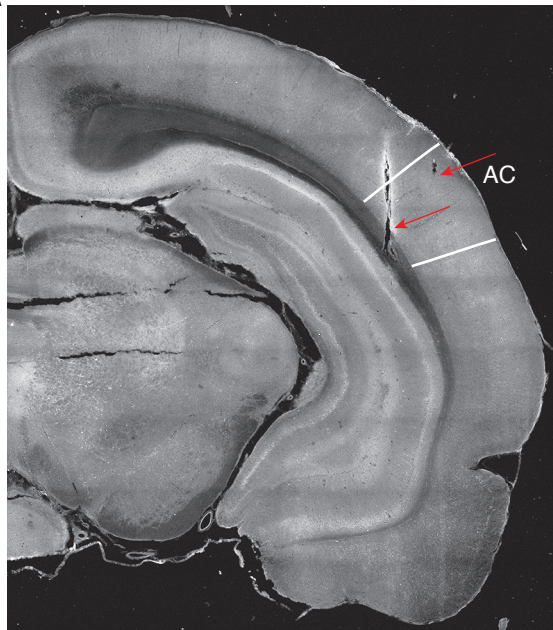

1 mm

AP = -5.4 mm from Bregma

**B**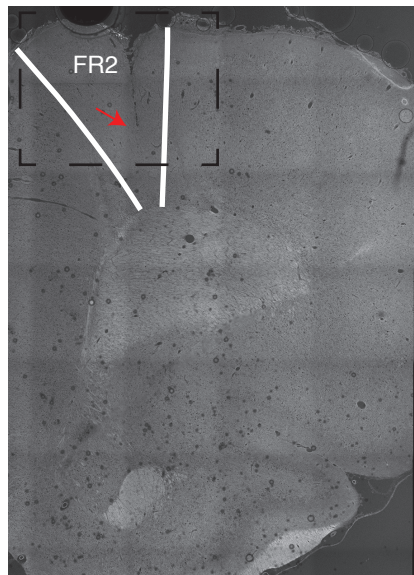

1 mm

AP = 2.9 mm from Bregma

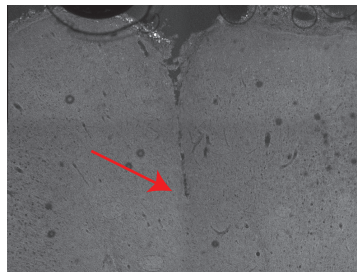

0.25 mm

Supplement: supp [file elife-42409-supp-v1.zip › elife_poa_e42409_Figure_1_figure_supplement_4.pdf]

## Muscimol AC

**A**

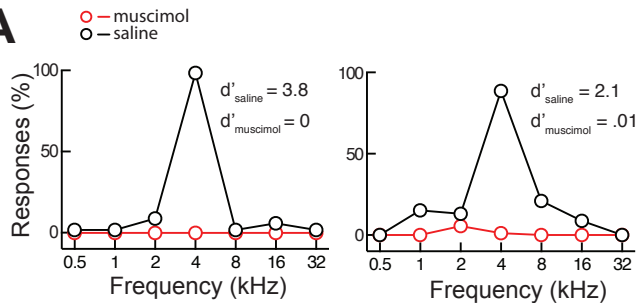

**B**

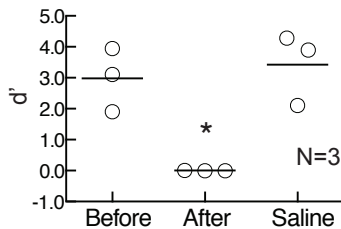

**C**

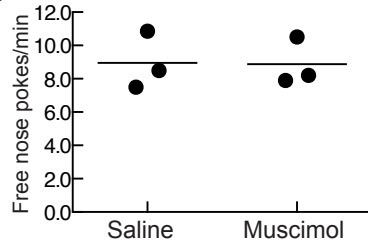

## Muscimol FR2

**D**

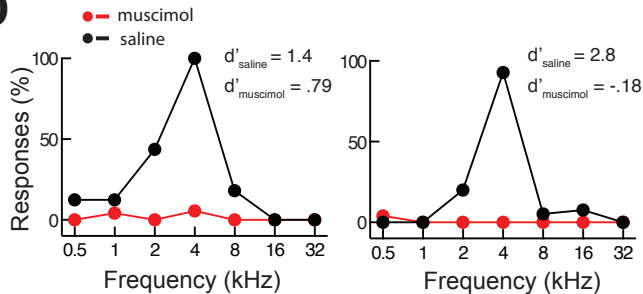

**E**

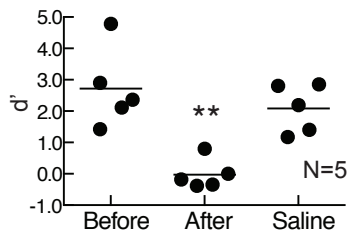

**F**

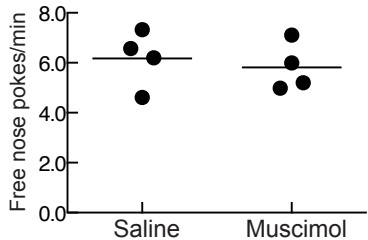

Supplement: supp [file elife-42409-supp-v1.zip › elife_poa_e42409_Figure_1_figure_supplement_3.pdf]

AC

Stimulus

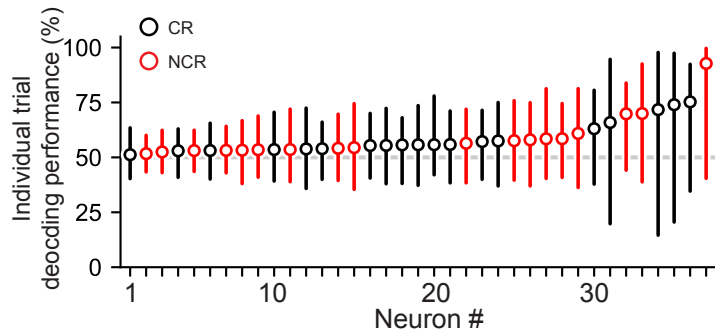

FR2

Stimulus

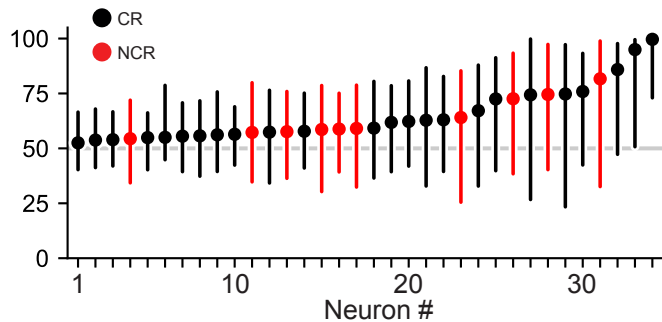

Choice

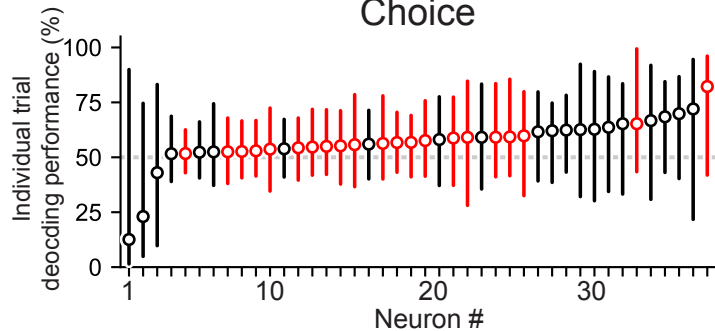

Choice

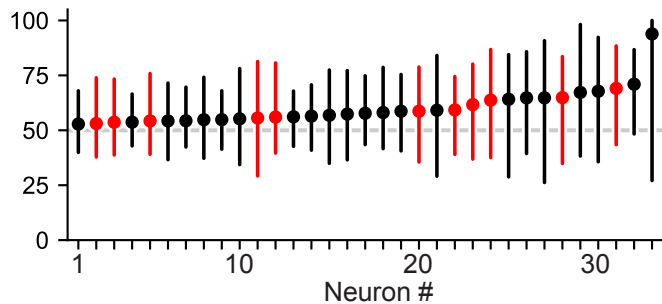

Supplement: supp [file elife-42409-supp-v1.zip › elife_poa_e42409_Figure_4_figure_supplement_1.pdf]

**A**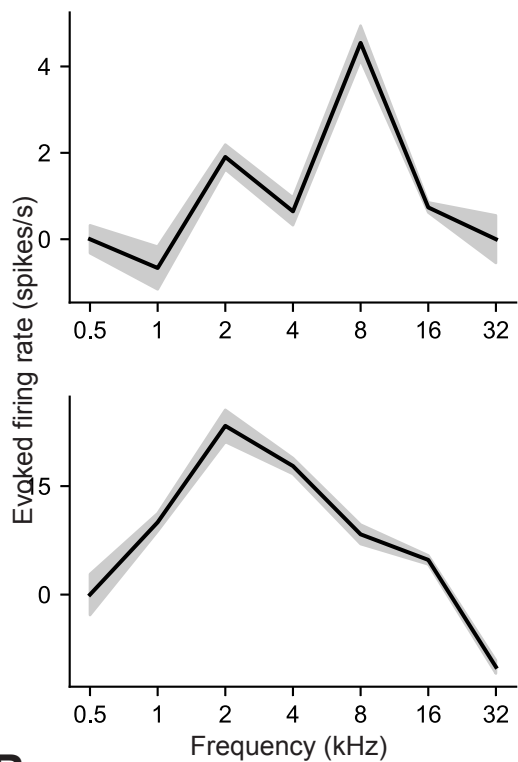**B**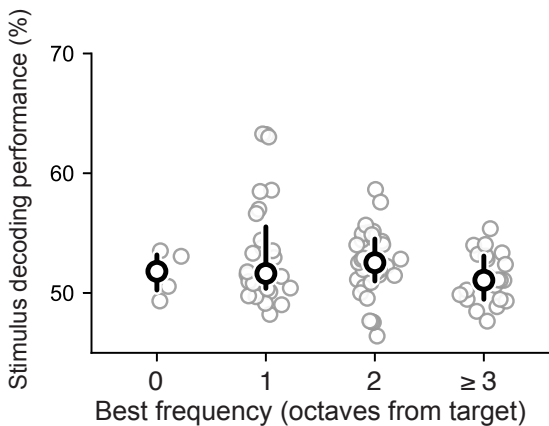**C**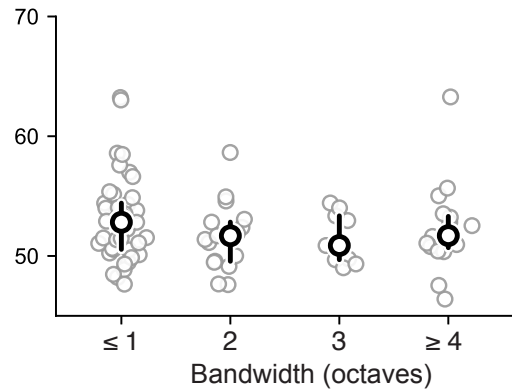

Supplement: supp [file elife-42409-supp-v1.zip › elife_poa_e42409_Figure_4_figure_supplement_3.pdf]

**A**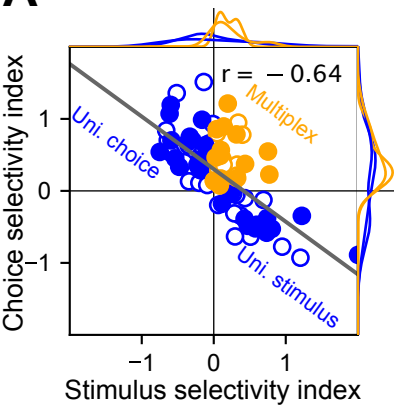**B**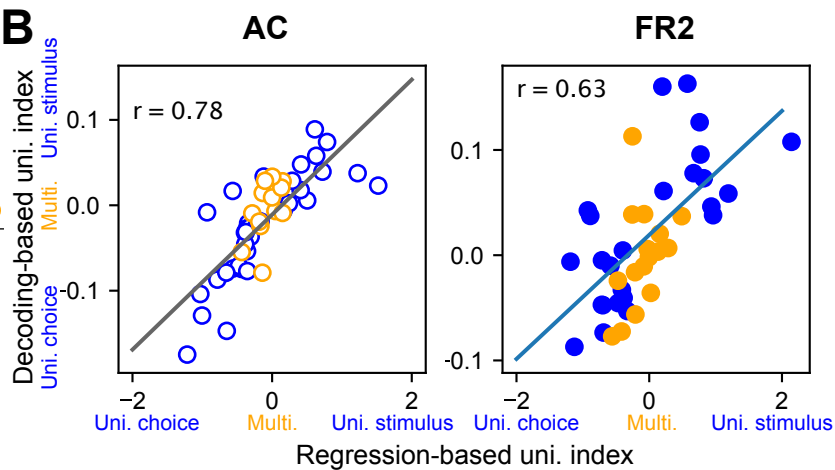**C**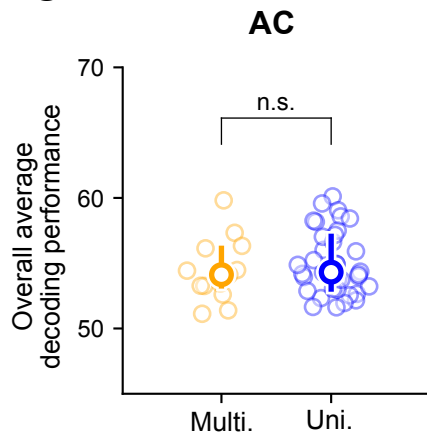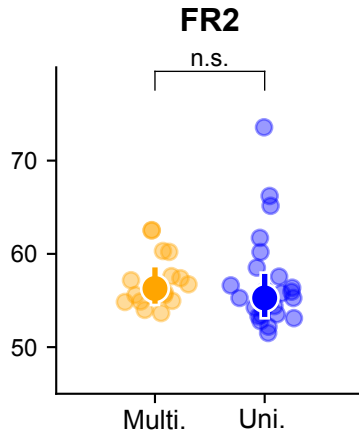

Supplement: supp [file elife-42409-supp-v1.zip › elife_poa_e42409_Figure_4_figure_supplement_4.pdf]

**A**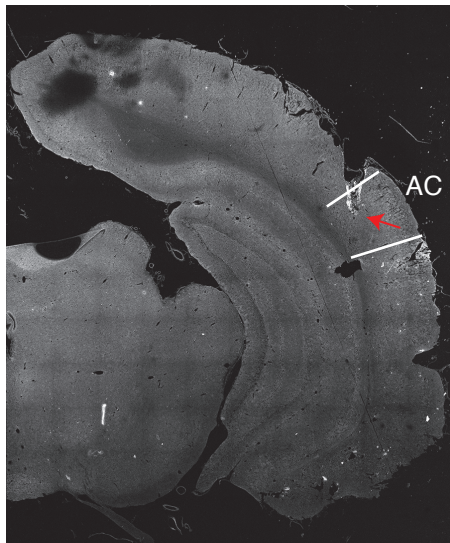

1 mm

AP = -5.8 mm from Bregma

**B**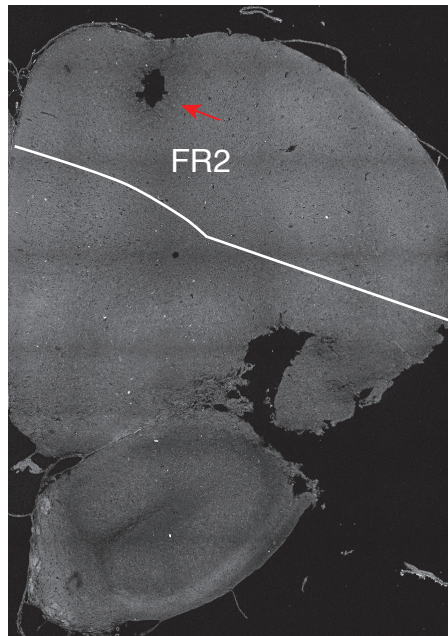

1 mm

AP = 4 mm from Bregma

Supplement: supp [file elife-42409-supp-v1.zip › elife_poa_e42409_Figure_1_figure_supplement_2.pdf]

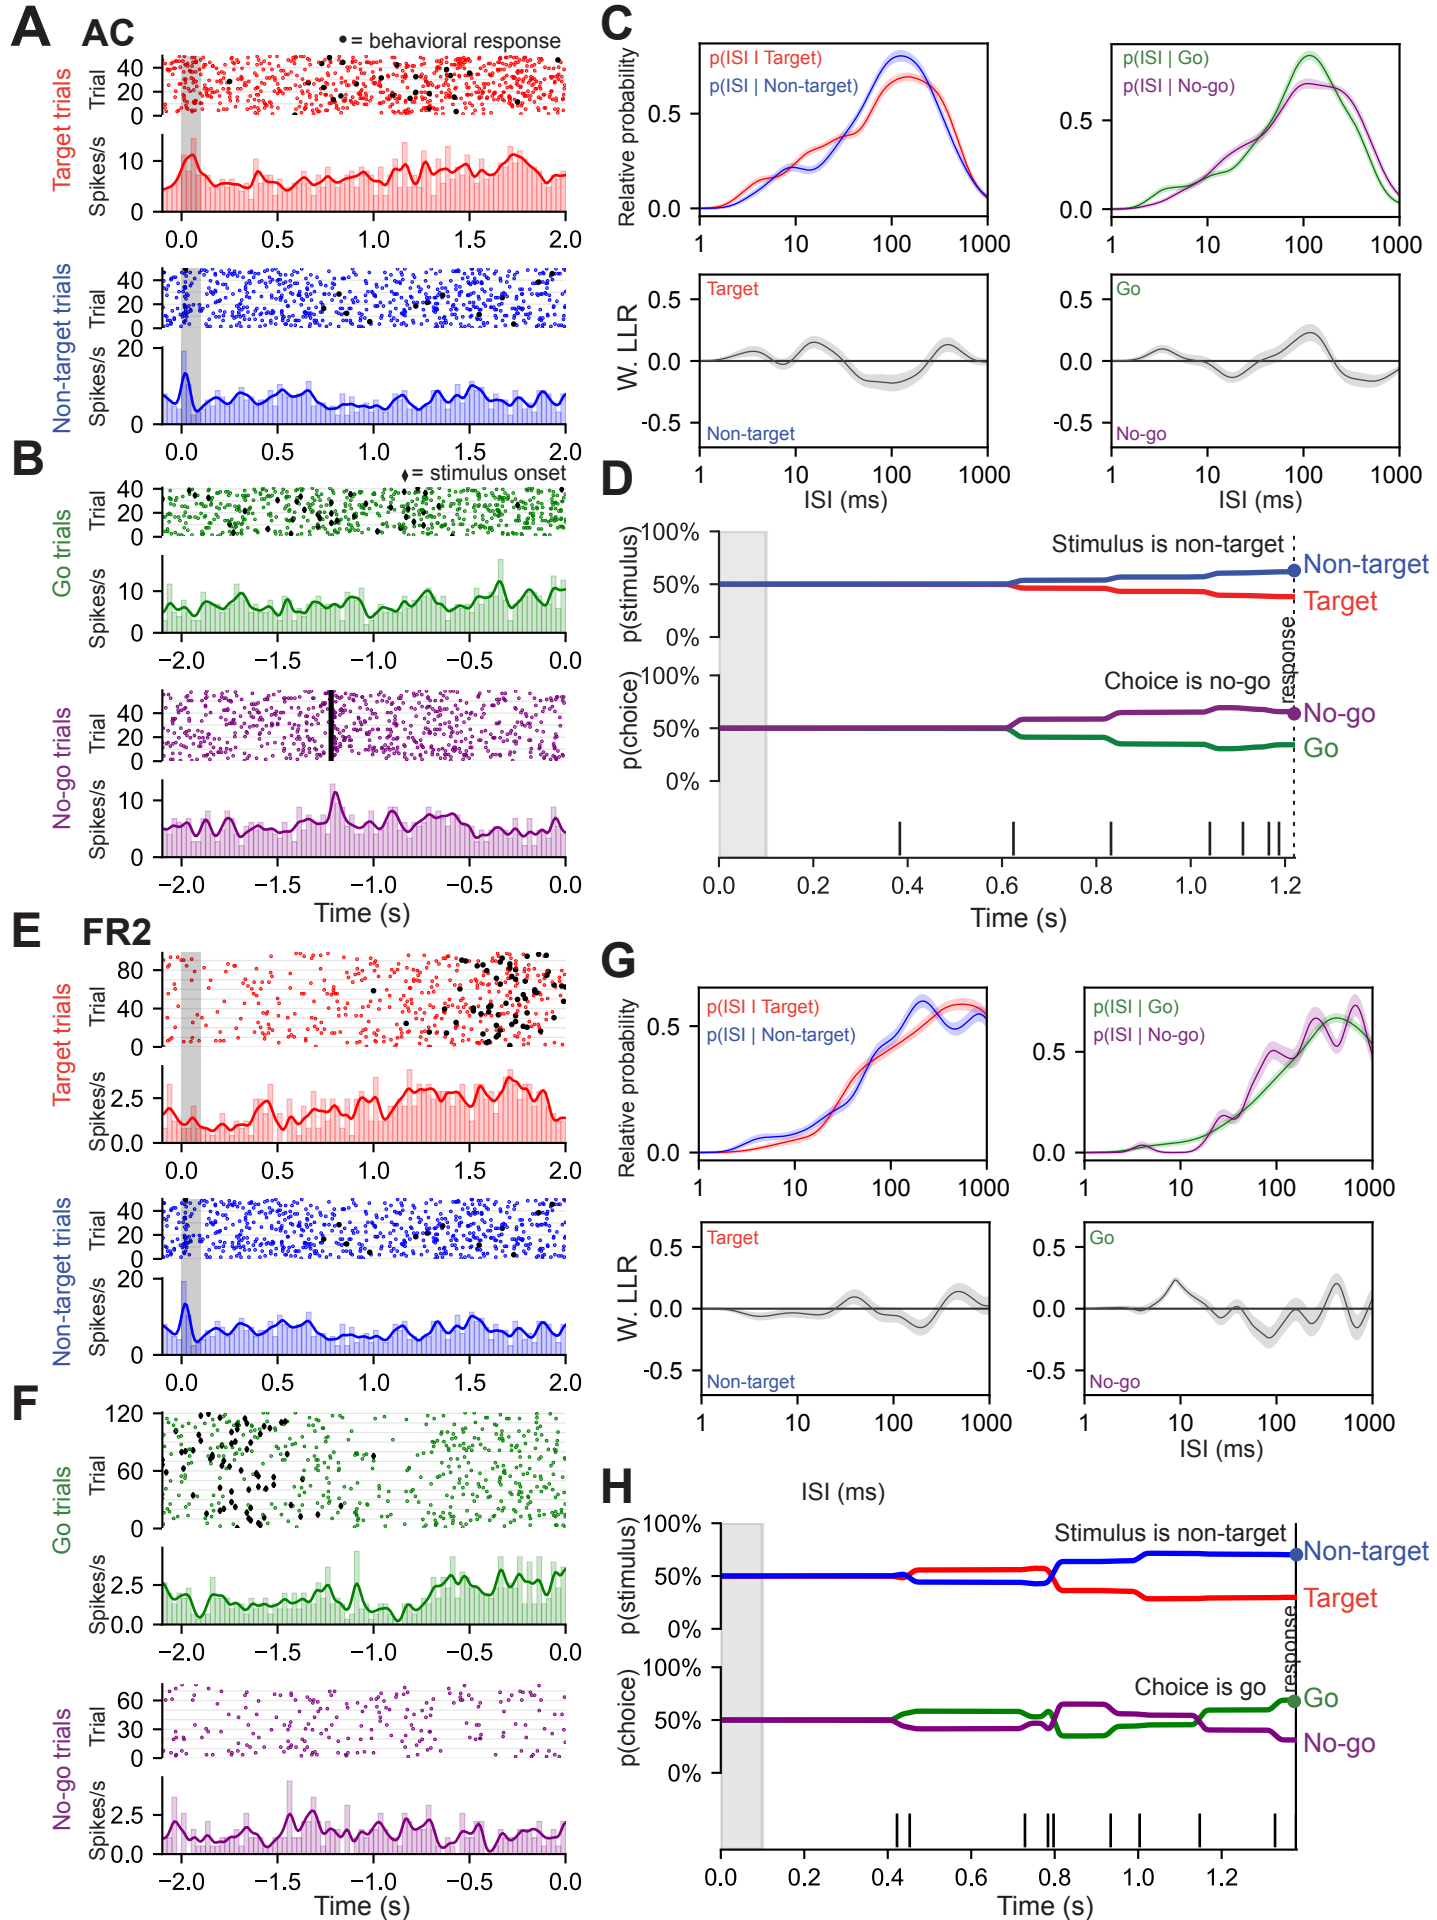

Supplement: supp [file elife-42409-supp-v1.zip › elife_poa_e42409_Figure_3_figure_supplement_1.pdf]

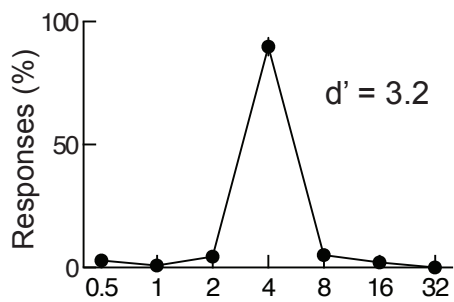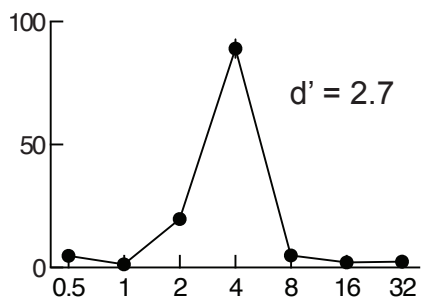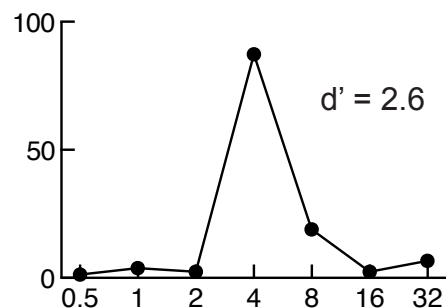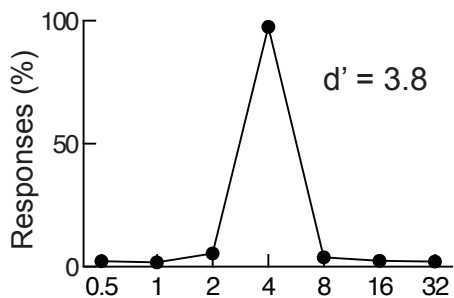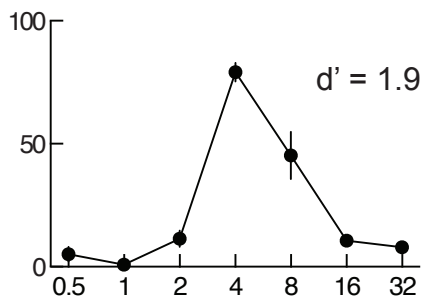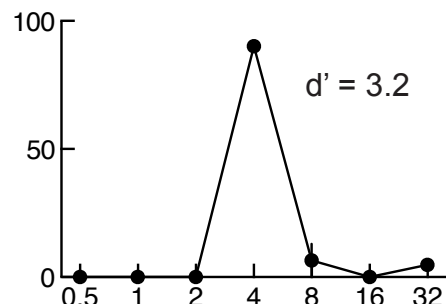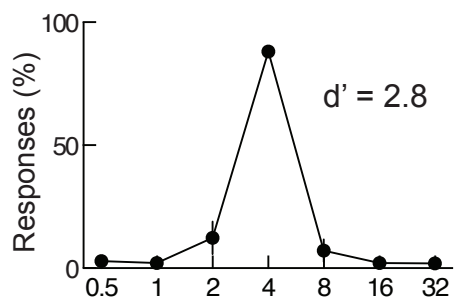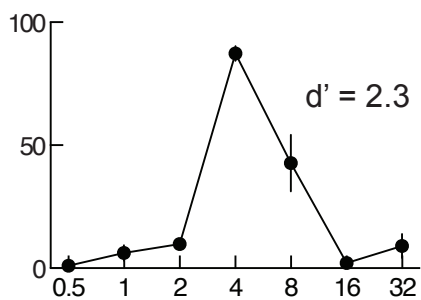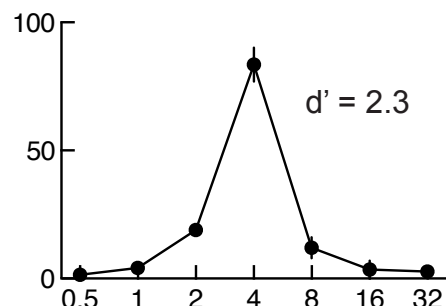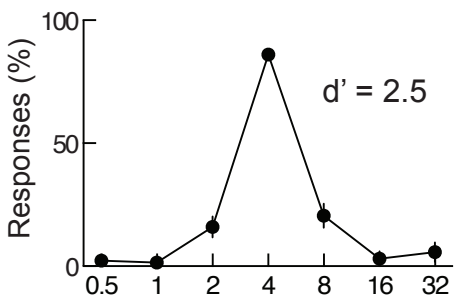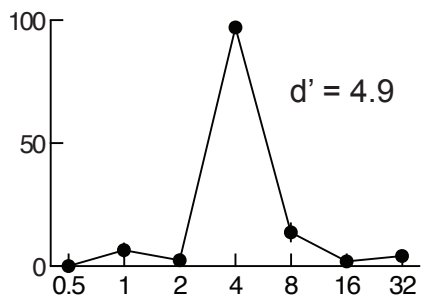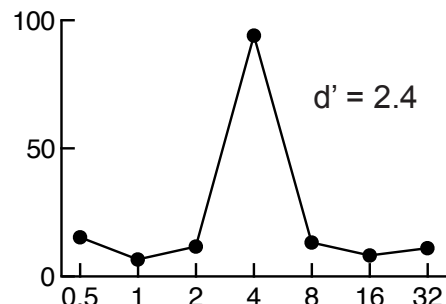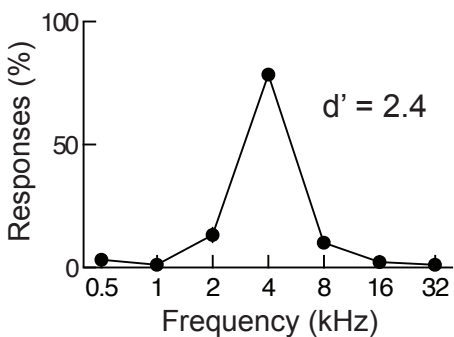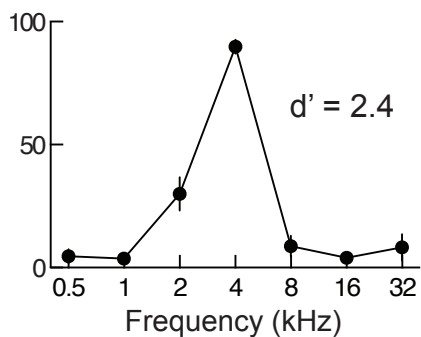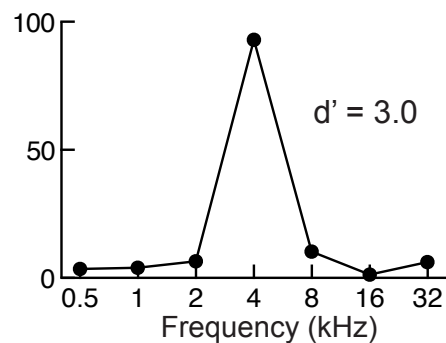

Supplement: supp [file elife-42409-supp-v1.zip › elife_poa_e42409_Figure_1_figure_supplement_1.pdf]

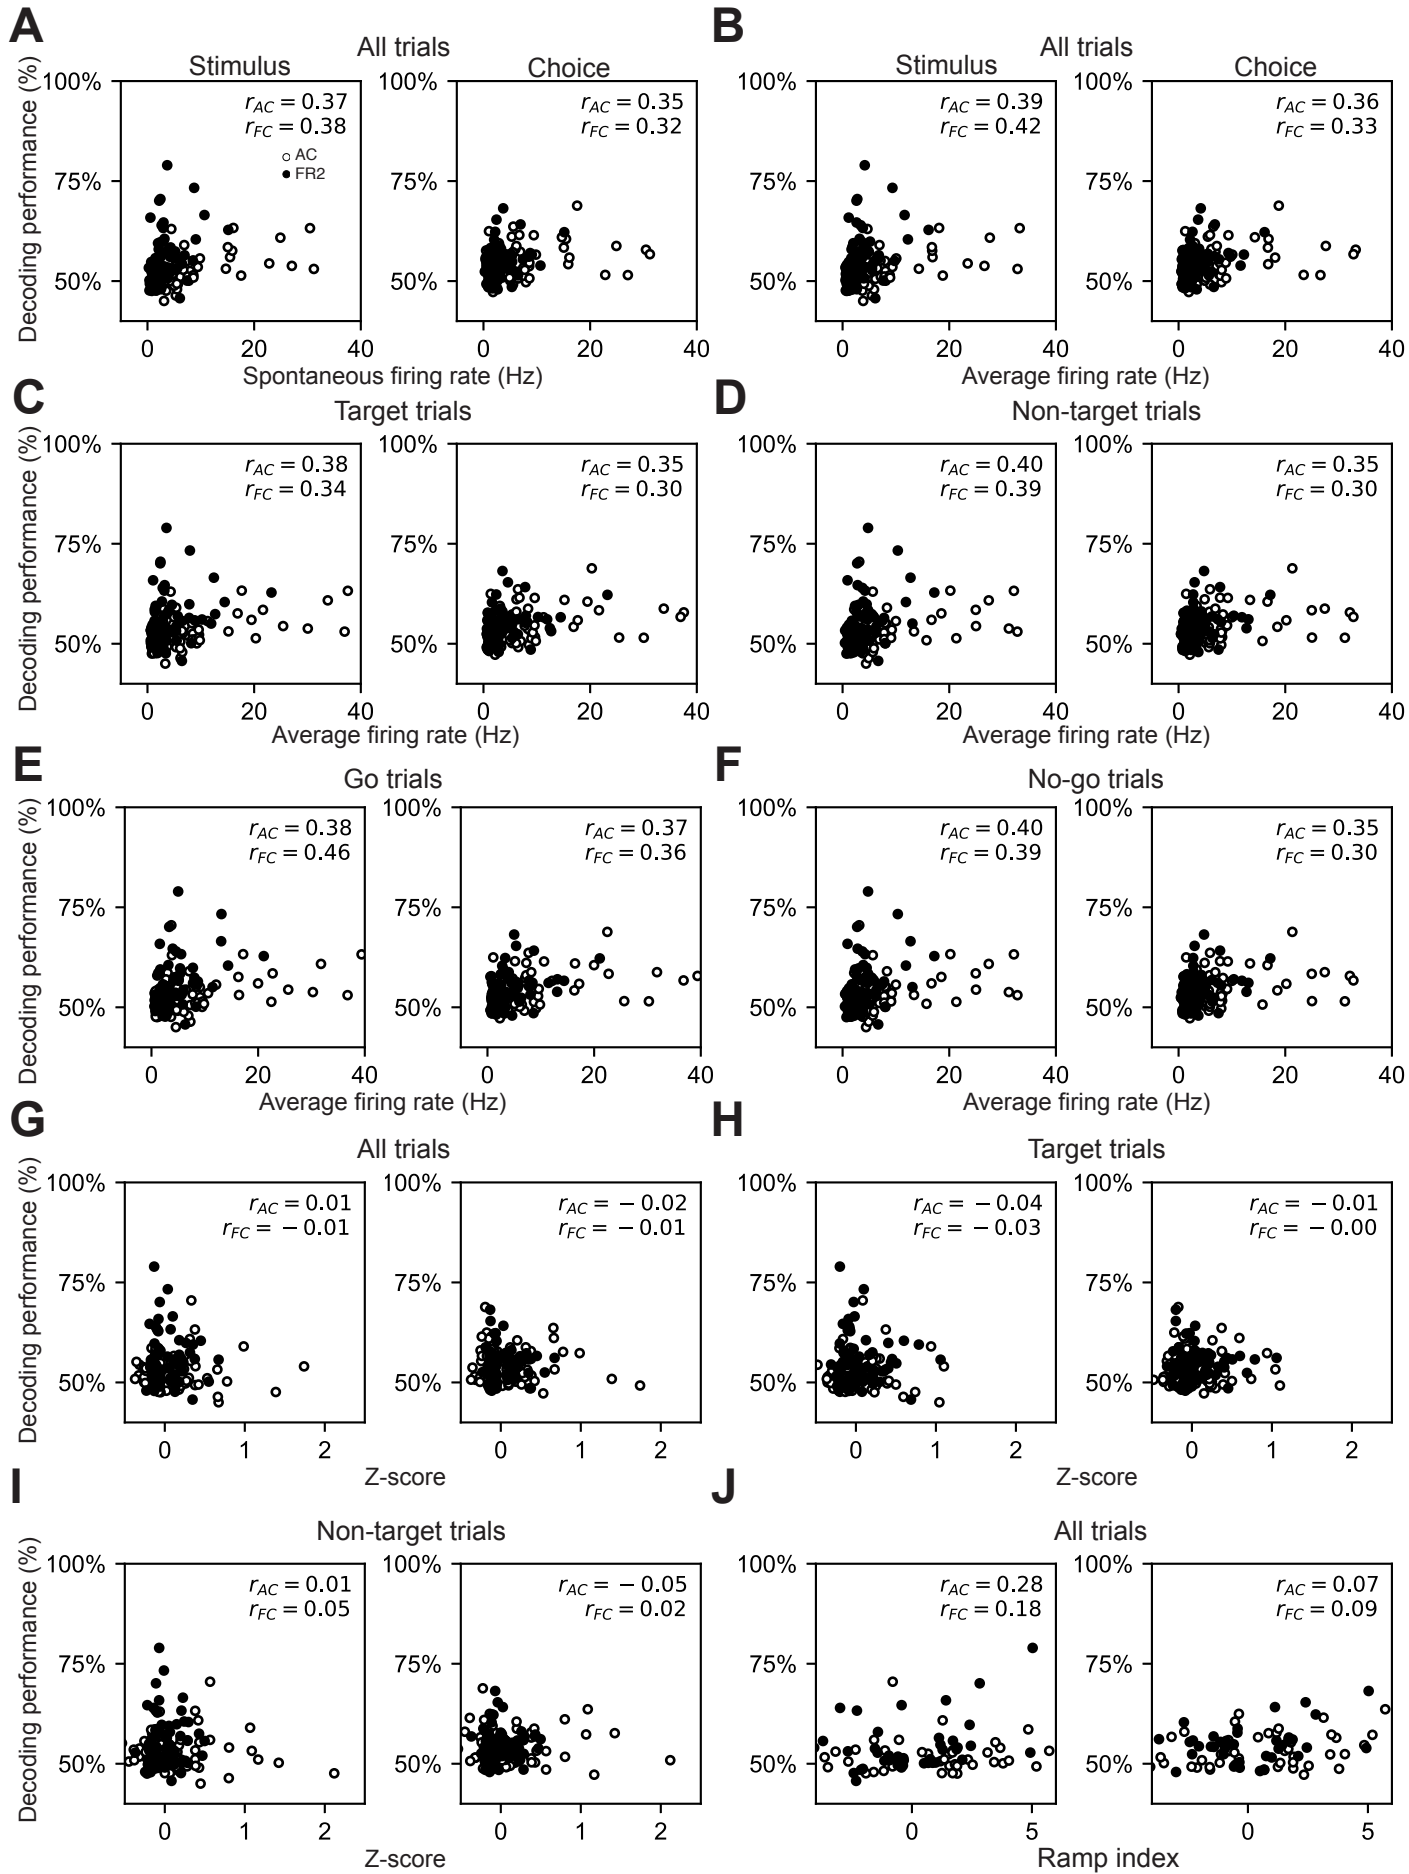

Supplement: supp [file elife-42409-supp-v1.zip › elife_poa_e42409_Figure_4_figure_supplement_2.pdf]

## Example Cell 1 (AC)

### Correct trials

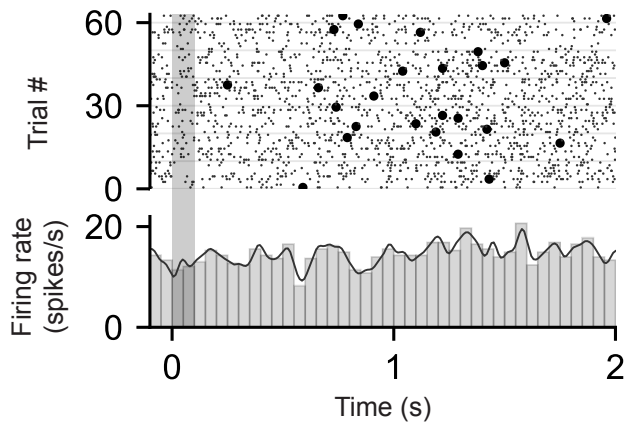

## Example Cell 2 (FR2)

### Correct trials

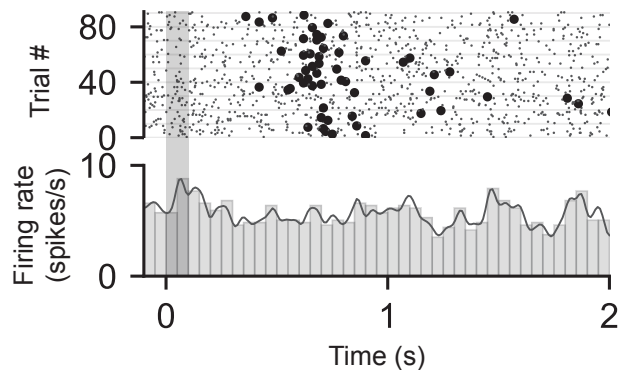

### Error trials

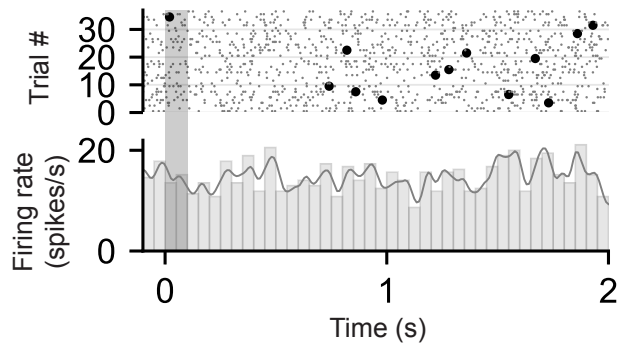

### Error trials

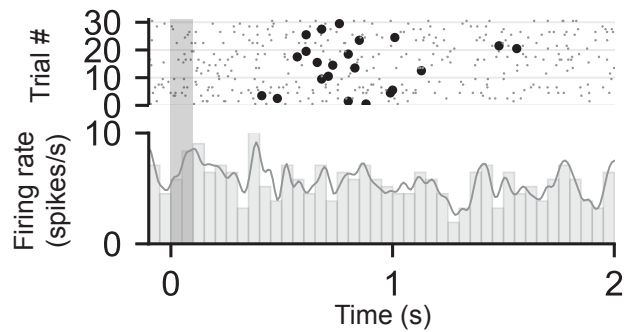

Supplement: supp [file elife-42409-supp-v1.zip › elife_poa_e42409_Figure_7_figure_supplement_1.pdf]

**A** Example 1 (FR2, target)  
 $D_{KL} = 0.07$ ,  $\Delta LL = 0.02$

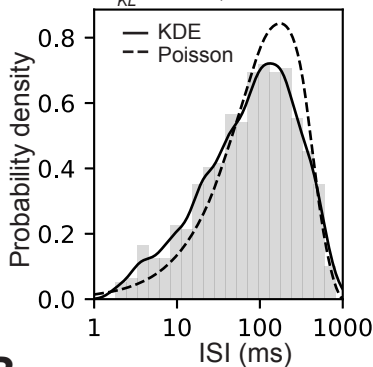

Example 2 (AC, target)  
 $D_{KL} = 0.32$ ,  $\Delta LL = 0.05$

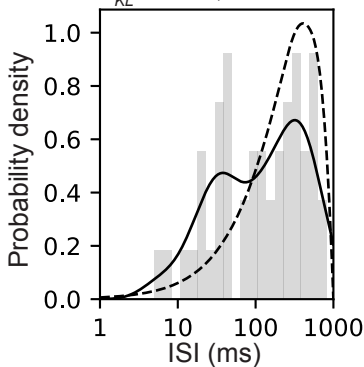

**B**

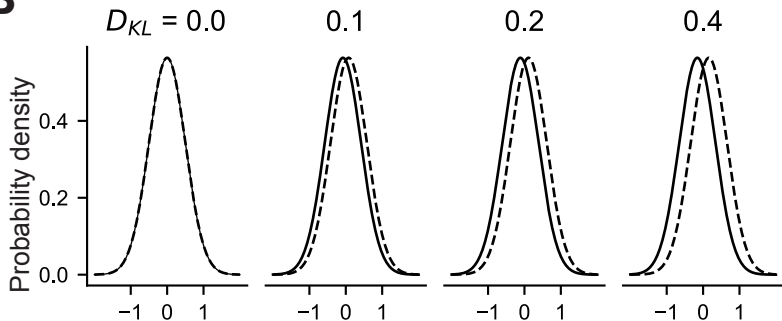

**C**

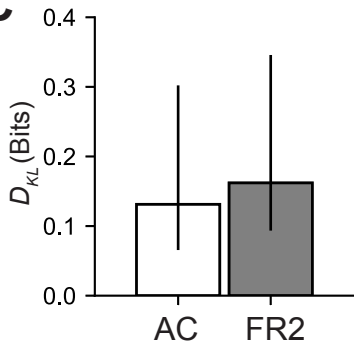

**D**

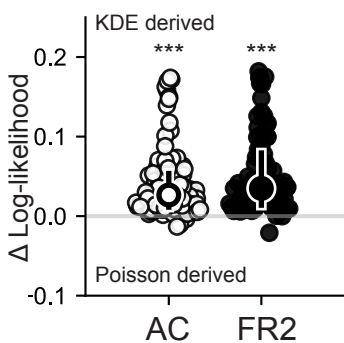

Supplement: supp [file elife-42409-supp-v1.zip › elife_poa_e42409_Figure_3_figure_supplement_2.pdf]
